# Supplementary material
Source: PubMed Central journal article supplement (PMC5754779)
Supplement: pnas.1711836114.sapp.pdf [file pnas.1711836114.sapp.pdf]

## Supporting Information

### **Self-Healing Catalysis in Water**

Short Title: Self-healing catalysis in water

Cyrille Costentin<sup>a,\*</sup> and Daniel G. Nocera<sup>b,\*</sup>

<sup>a</sup> *Laboratoire d'Electrochimie Moléculaire, Unité Mixte de Recherche Université - CNRS N° 7591, Bâtiment Lavoisier, Université Paris Diderot, Sorbonne Paris Cité, 15 rue Jean de Baïf, 75205 Paris Cedex 13, France.* <sup>b</sup> *Department of Chemistry and Chemical Biology, 12 Oxford Street, Harvard University, Cambridge, MA USA 02138.*

Email: [cyrille.costentin@univ-paris-diderot.fr](mailto:cyrille.costentin@univ-paris-diderot.fr); [dnocera@fas.harvard.edu](mailto:dnocera@fas.harvard.edu)

## Formal Kinetics Model for Self-Healing

The chemical steps for self-healing are,

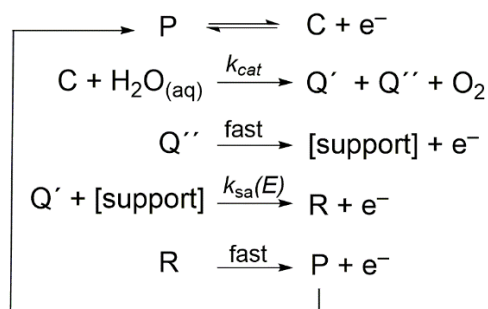

where the various individual species are defined in terms of alphabetical labels of Figure 3 in the text. The [support] term indicates a Co(III) film with a vacancy for re-insertion of Co ion into the film. The  $\text{H}^+$  and  $\text{P}_i$  concentrations are included in the operand rate constants for  $k_{\text{sa}}$  and  $k_{\text{OER}}$  and hence the scheme only accounts for electron equivalency ( $\text{e}^-$ ).

We consider a catalytic system operated at a constant electrode potential  $E$  in a solution containing a large concentration of substrate (in this case,  $\text{H}_2\text{O}$ ) but initially no  $\text{Q}'$  ( $\text{Co}^{2+}$  ion in solution). The initial surface concentration of  $\text{CoP}_i$  deposited onto the electrode is  $\Gamma_{\text{CoP}_i}^0$  (which defines the total Co concentration). We assume that self-exchange electron transport in the  $\text{CoP}_i$  film is sufficiently fast (see text) and thus the  $\text{CoP}_i$  film behaves as a catalytic monolayer. The electrode surface area is  $S$  and the volume of the solution is  $V$ . We consider well-defined hydrodynamic conditions (i.e. a constant diffusion layer  $\delta$ ) and linear diffusion of  $\text{Q}'$  (with diffusion coefficient  $D$ ). The substrate (i.e.,  $\text{H}_2\text{O}$ ) is in large excess and its concentration  $C_{\text{substrate}}^0$  is constant throughout the solution.

The kinetic behavior of  $\text{Q}'$  is sketched in Scheme S1, representing the concentration profile of  $\text{Q}'$

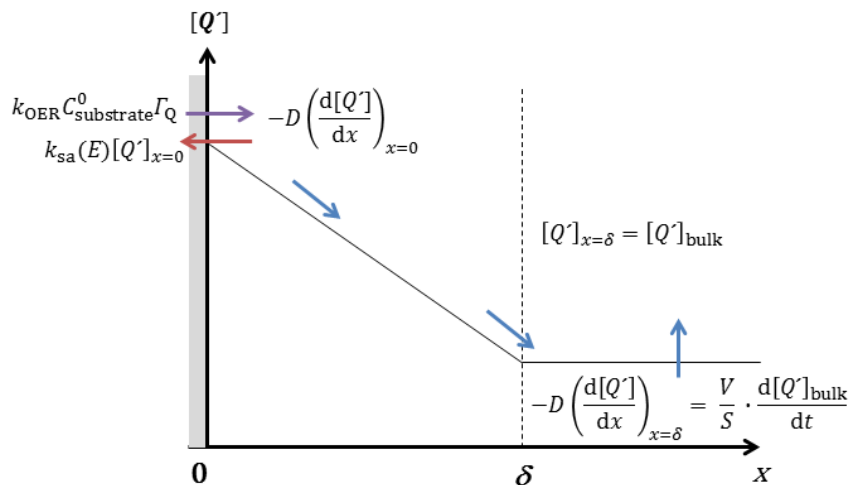

**Scheme S1.** Rate constant dependence of the concentration of  $\text{Co}^{2+}$  ions in solution as a function of distance from the electrode surface.

and the various boundary relationships detailed below (the catalytic film on the electrode surface is at  $x = 0$ ).

*At diffusion layer/catalytic film interface,  $x = 0$ :*

The flux of  $Q'$  leaching from the catalytic film is equal to difference between the rate of pre-catalyst production and the rate of catalyst assembly,

$$-D \left( \frac{d[Q']}{dx} \right)_{x=0} = k_{\text{OER}} C_{\text{substrate}}^0 \Gamma_C - k_{\text{sa}}(E) [Q']_{x=0}$$

where  $\Gamma_C$  is surface concentration of active catalyst C,  $C_{\text{substrate}}^0$  is effectively 1 since it is the solvent, and  $k_{\text{sa}}$  and  $k_{\text{OER}}$  are the rate constants defined in Figure 3.

*In the diffusion layer,  $0 < x < \delta$ :*

Mass transport of the  $Q'$  occurs only by diffusion:

$$\left( \frac{d^2[Q']}{dx^2} \right) = 0,$$

hence

$$D \left( \frac{d[Q']}{dx} \right)_{x=0} = D \left( \frac{d[Q']}{dx} \right)_{x=\delta}$$

and

$$D \left( \frac{d[Q']}{dx} \right)_{x=0} = \frac{D}{\delta} ([Q']_{x=\delta} - [Q']_{x=0})$$

*At the solution bulk/diffusion layer boundary,  $x = \delta$ :*

The rate of  $Q'$  accumulation in the solution bulk is equal to the flux of  $Q'$  out of the diffusion layer:

$$-D \left( \frac{d[Q']}{dx} \right)_{x=\delta} = \frac{V}{S} \cdot \frac{d[Q']_{\text{bulk}}}{dt}$$

and

$$[Q']_{x=\delta} = [Q']_{\text{bulk}}$$

We assume a Nernstian behavior for the P/C couple defined by standard potential  $E_{\text{cat}}^0$ , fast catalysis and fast oxidation of both  $Q''$  and R. Under these conditions,

$$\Gamma_C \approx \left( \Gamma_{\text{CoPi}}^0 - \frac{V}{S} [Q']_{x=\delta} \right) \cdot \exp \left[ \frac{F(E - E_{\text{cat}}^0)}{RT} \right]$$

Thus

$$\begin{aligned} k_{\text{OER}} C_{\text{substrate}}^0 \Gamma_C &= k_{\text{OER}} C_{\text{substrate}}^0 \left\{ \left( \Gamma_{\text{CoPi}}^0 - \frac{V}{S} [Q']_{x=\delta} \right) \cdot \exp \left[ \frac{F(E - E_{\text{cat}}^0)}{RT} \right] \right\} \\ &= k_{\text{OER}}^{\text{app}}(E) - k'_{\text{OER}}{}^{\text{app}}(E) [Q']_{x=\delta} \end{aligned}$$

where

$$\begin{aligned} k_{\text{OER}}^{\text{app}}(E) &= k_{\text{OER}} C_{\text{substrate}}^0 \left\{ \Gamma_{\text{CoPi}}^0 \exp \left[ - \frac{F(E_{\text{cat}}^0)}{RT} \right] \right\} \\ k'_{\text{OER}}{}^{\text{app}}(E) &= k_{\text{OER}} C_{\text{substrate}}^0 \left\{ \frac{V}{S} \cdot \exp \left[ \frac{F(E - E_{\text{cat}}^0)}{RT} \right] \right\} \end{aligned}$$

Then the flux of Q' leaching from the catalytic film is,

$$-D \left( \frac{d[Q']}{dx} \right)_{x=0} = k_{\text{OER}}^{\text{app}}(E) - k'_{\text{OER}}{}^{\text{app}}(E) [Q']_{x=\delta} - k_{\text{sa}}(E) [Q']_{x=0} = -\frac{D}{\delta} ([Q']_{x=\delta} - [Q']_{x=0})$$

leading to,

$$[Q']_{x=0} = \frac{k_{\text{OER}}^{\text{app}}(E) + \left[ \frac{D}{\delta} - k'_{\text{OER}}{}^{\text{app}}(E) \right] [Q']_{x=0}}{\left[ \frac{D}{\delta} + k_{\text{sa}}(E) \right]}$$

and finally,

$$\frac{d[Q']_{\text{bulk}}}{dt} + \frac{S}{V} \cdot \frac{D}{\delta} \left( \frac{k_{\text{OER}}^{\text{app}}(E) + k_{\text{sa}}(E)}{\frac{D}{\delta} + k_{\text{sa}}(E)} \right) [Q']_{\text{bulk}} = \frac{S}{V} \cdot \frac{D}{\delta} \left( \frac{k_{\text{OER}}^{\text{app}}(E)}{\frac{D}{\delta} + k_{\text{sa}}(E)} \right)$$

Taking into account that  $([Q']_{\text{bulk}})_{t=0} = 0$  leads to,

$$[Q']_{\text{bulk}} = \frac{k_{\text{OER}}^{\text{app}}(E)}{k'_{\text{OER}}{}^{\text{app}}(E) + k_{\text{sa}}(E)} \left[ 1 - \exp \left( -\frac{t}{\tau} \right) \right]$$

with

$$\tau = \frac{V}{S} \cdot \frac{\delta}{D} \left( \frac{\frac{D}{\delta} + k_{sa}(E)}{k_{OER}^{app}(E) + k_{sa}(E)} \right) = \frac{1 + \frac{k_{sa}(E)}{D/\delta}}{k_{OER}(E) + \frac{k_{sa}(E)}{V/S}}$$

taking into account that  $k_{OER}(E)$  introduced in the text corresponds to,

$$k_{OER}^{app}(E) = \frac{V}{S} k_{OER}(E)$$

The fraction of remaining active film after equilibration of  $Co^{2+}$  ion with the bulk solution is,

$$\frac{\Gamma_{CoPi}^{active}}{\Gamma_{CoPi}^0} \approx 1 - \frac{V}{S} \frac{[Q']_{bulk}}{\Gamma_{CoPi}^0} = 1 - \frac{V}{S} \cdot \frac{k_{OER}^{app}(E)}{k_{OER}^{app}(E) + k_{sa}(E)} \left[ 1 - \exp\left(-\frac{t}{\tau}\right) \right]$$

When  $t \gg \tau$ , a steady-state limit is reached and

$$\frac{\Gamma_{CoPi}^{active}}{\Gamma_{CoPi}^0} = 1 - \frac{V}{S} \left( \frac{k_{OER} C_{substrate}^0 \cdot \exp\left[\frac{F(E - E_{cat}^0)}{RT}\right]}{k_{OER} C_{substrate}^0 \frac{V}{S} \cdot \exp\left[\frac{F(E - E_{cat}^0)}{RT}\right] + k_{sa}(E)} \right)$$

i.e.

$$\frac{\Gamma_{CoPi}^{active}}{\Gamma_{CoPi}^0} = \frac{k_{sa}(E)}{k_{OER} C_{substrate}^0 \frac{V}{S} \cdot \exp\left[\frac{F(E - E_{cat}^0)}{RT}\right] + k_{sa}(E)}$$

Considering the expressions of  $k_{sa}(E)$  and  $k_{OER}(E) = k_{OER} C_{substrate}^0 \exp\left[\frac{F(E - E_{cat}^0)}{RT}\right]$  for CoPi as given in the text (Eqs. (3) and (5)), and rearranging the above expression, Eq. (6) given in the text is straightforwardly obtained.
